# Supplementary material for: Microfluidic paper-based analytical device using gold nanoparticles modified with N,N′-bis(2-hydroxyethyl)dithiooxamide for detection of Hg(ii) in air, fish and water samples
Source: Royal Society of Chemistry journal article supplement (doi:10.1039/d0nj03986a), 2020-01-01
Supplement: d0nj03986a1.pdf [file d0nj03986a1.pdf]

**Electronic Supplementary Information**

**New Journal of Chemistry**

**Microfluidic paper-based analytical device using gold nanoparticles modified with N,N'-bis(2-hydroxyethyl)dithiooxamide for detection of Hg(II) in air, fish and water samples**

Sattar Shariati,\*Gholamreza Khayatian

*Department of Chemistry, Faculty of Science, University of Kurdistan, Sanandaj, Iran*

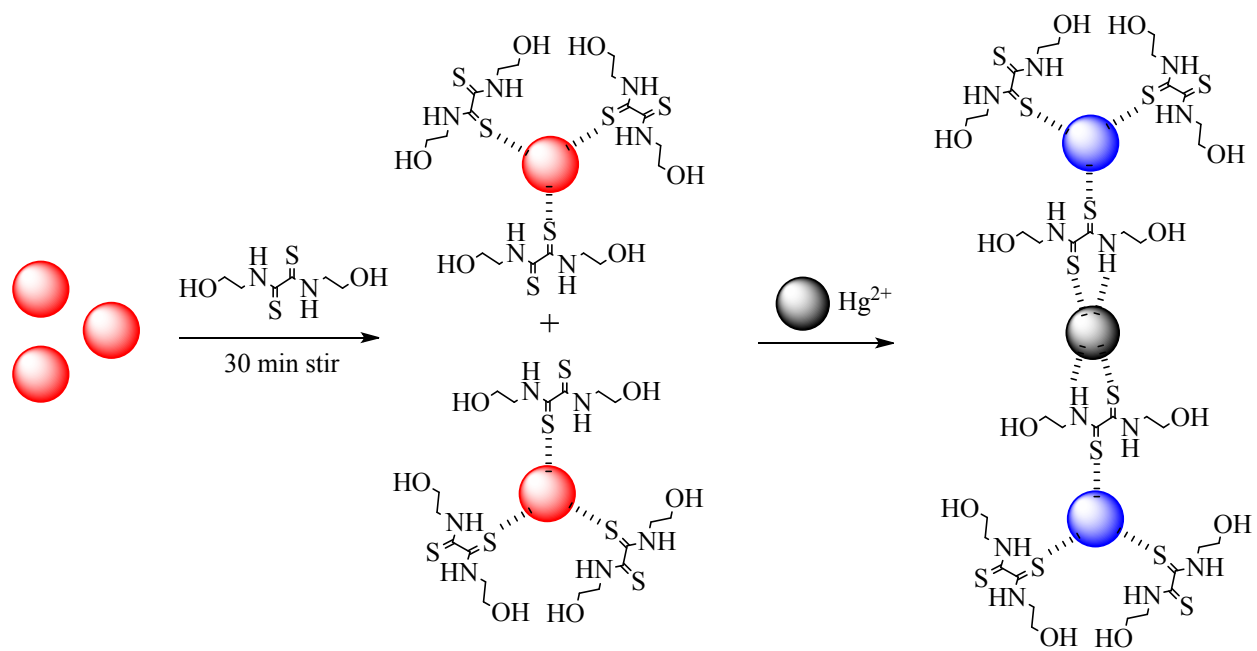

**Fig. S1.** Schematic illustration of possible cross-linking mechanism for aggregation of HEDTO-AuNPs in the presence of  $\text{Hg}^{2+}$

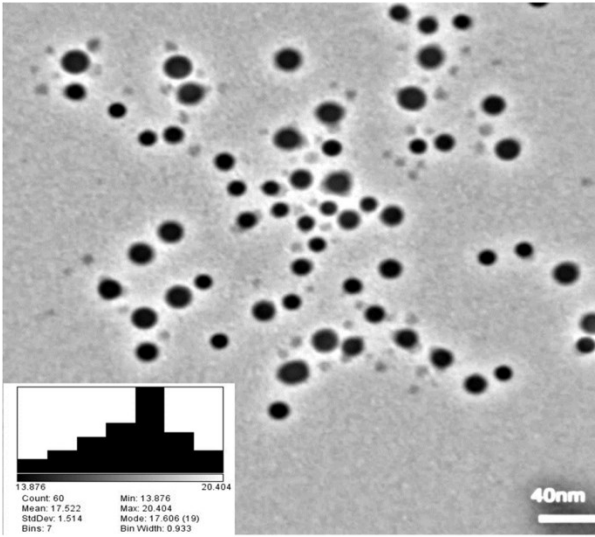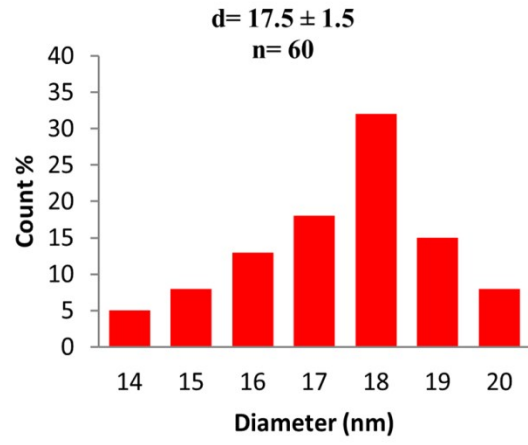

**Fig. S2.** TEM image of HEDTO-AuNPs and the size distribution of HEDTO-AuNPs

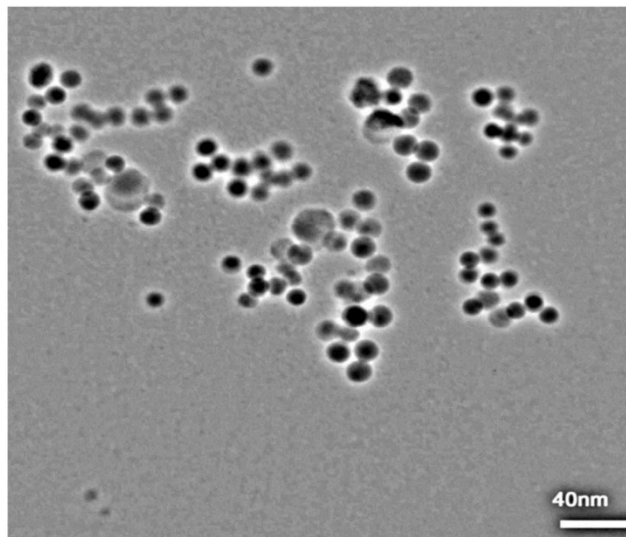

**Fig. S3.** TEM image of HEDTO–AuNPs in the presence of 10.0  $\mu\text{M}$   $\text{Hg}^{2+}$

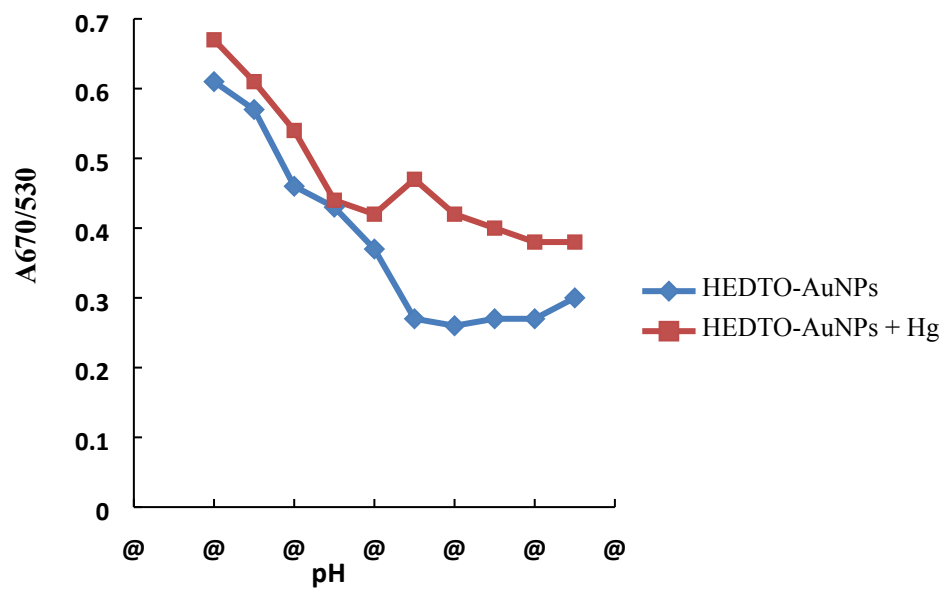

**Fig. S4.** Effect of pH on the HEDTO-AuNPs in the absence and presence of 10.0  $\mu\text{M}$   $\text{Hg}^{2+}$

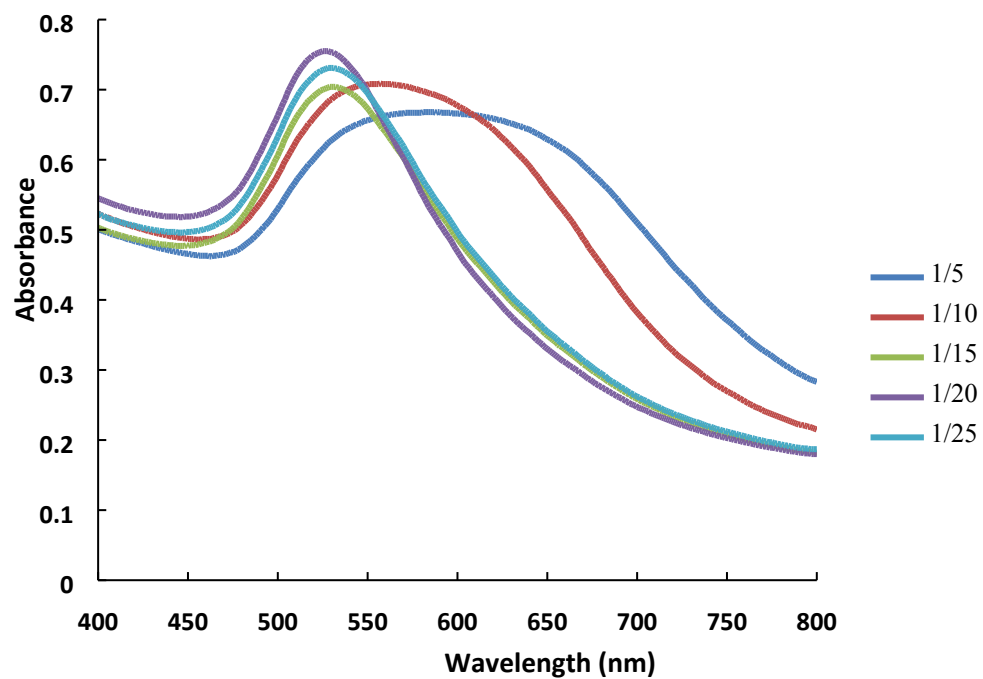

**Fig. S5.** Effect of concentration ratios of HEDTO-AuNPs

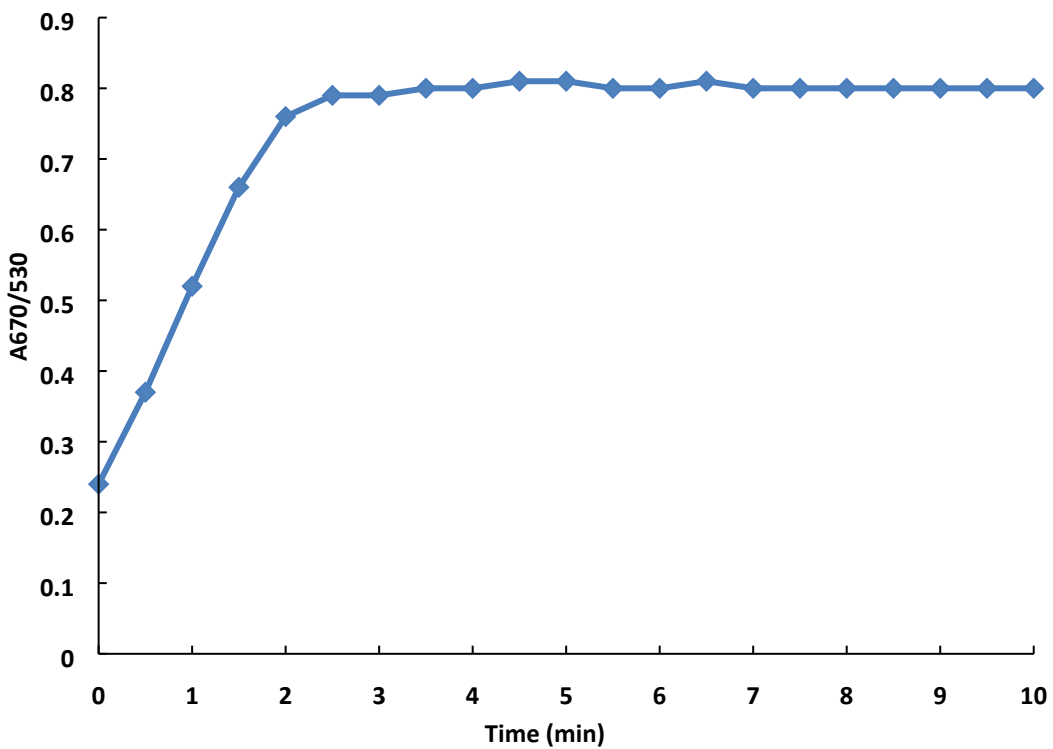

**Fig. S6.** The absorbance intensity ratio of HEDTO-AuNPs solution at different times in the presence of 5.0  $\mu\text{M}$  of  $\text{Hg}^{2+}$

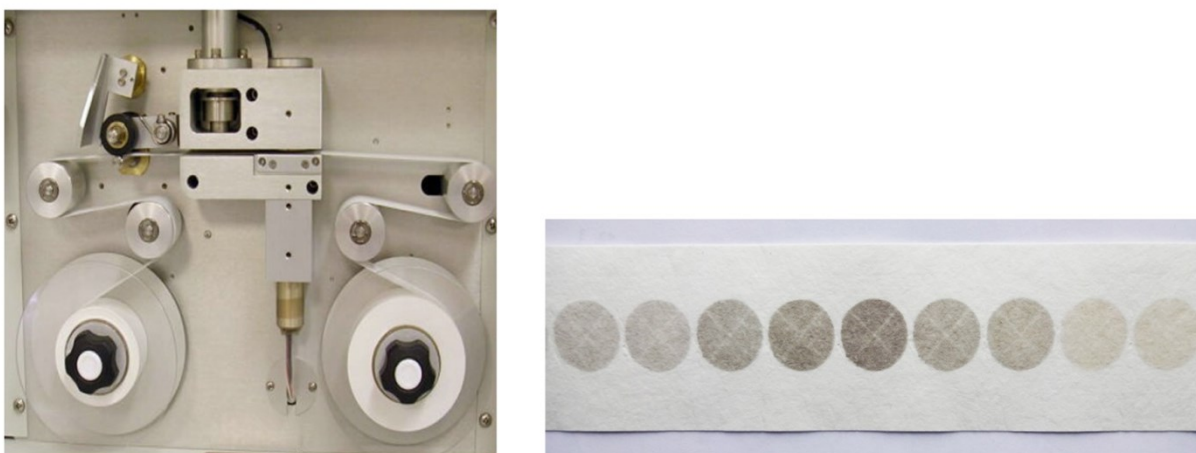

**Fig. S7.** BAM 1020 particulate monitor device and the dust particles collected on paper filters in BAM 1020 particulate monitor
